# Supplementary material
Source: PubMed Central journal article supplement (PMC9941859)
Supplement: sj-pdf-1-jcb-10.1177_0271678X221133861.pdf [file sj-pdf-1-jcb-10.1177_0271678X221133861.pdf]

## Supplementary Material

### One-Year Aerobic Exercise Increases Cerebral Blood Flow in Cognitively Normal Older Adults

Tsubasa Tomoto<sup>1,2,3</sup>, Aryan Verma<sup>1</sup>, Kayla Kostroske<sup>1</sup>, Takashi Tarumi<sup>1,2,3,4</sup>, Neena R. Patel<sup>1,3</sup>,  
Evan P. Pasha<sup>1,3</sup>, Jonathan Riley<sup>1</sup>, Cynthia D. Tinajero<sup>1</sup>, Linda S. Hynan<sup>5,6</sup>, Karen M. Rodrigue<sup>7</sup>,  
Kristen M. Kennedy<sup>7</sup>, Denise C. Park<sup>7</sup>, Rong Zhang<sup>1,3,8</sup>

<sup>1</sup> Institute for Exercise and Environmental Medicine, Texas Health Presbyterian Hospital Dallas, Dallas, Texas, USA; <sup>2</sup> Human Informatics and Interaction Research Institute, National Institute of Advanced Industrial Science and Technology, Tsukuba, Ibaraki, Japan; <sup>3</sup> Department of Neurology, <sup>5</sup> Department of Psychiatry, <sup>6</sup> Department of Population and Data Sciences, <sup>8</sup> Department of Internal Medicine, University of Texas Southwestern Medical Center, Dallas, Texas, USA; <sup>4</sup> Graduate School of Comprehensive Human Sciences, University of Tsukuba, Tsukuba, Ibaraki, Japan; <sup>7</sup> Center for Vital Longevity, School of Behavioral and Brain Sciences, The University of Texas at Dallas, Dallas, Texas, USA.

**Running Title:** Aerobic Exercise and Cerebral Hemodynamics

**Corresponding Author:** Rong Zhang, Ph.D.

**Office Address:** 7232 Greenville Avenue, Dallas, Texas 75231

**Telephone:** +1 (214) 345-4670 | Fax: +1 (214) 345-4618

**E-mail:** RongZhang@TexasHealth.org

**Table S1.** Volumetric blood flow, vessel diameter, and mean blood flow velocity by groups

|                                       | Stretching-and-Toning |            | Aerobic Exercise Training |            | Effect p-values |       |              |  |
|---------------------------------------|-----------------------|------------|---------------------------|------------|-----------------|-------|--------------|--|
|                                       | Baseline              | 12-month   | Baseline                  | 12-month   | Time            | Group | Time × Group |  |
| <i>Volumetric blood flow (mL/min)</i> |                       |            |                           |            |                 |       |              |  |
| R ICA                                 | 232 ± 48              | 236 ± 43   | 226 ± 32                  | 237 ± 52   | 0.238           | 0.800 | 0.622        |  |
| L ICA                                 | 209 ± 41              | 199 ± 42   | 206 ± 58                  | 217 ± 45   | 0.964           | 0.499 | 0.118        |  |
| R VA                                  | 80 ± 38               | 77 ± 34    | 73 ± 27                   | 77 ± 32    | 0.855           | 0.691 | 0.180        |  |
| L VA                                  | 80 ± 31               | 88 ± 34    | 79 ± 34                   | 81 ± 36    | 0.075           | 0.689 | 0.278        |  |
| <i>Vessel diameter (mm)</i>           |                       |            |                           |            |                 |       |              |  |
| R ICA                                 | 4.5 ± 2.6             | 4.7 ± 2.7  | 4.6 ± 2.9                 | 4.5 ± 2.6  | 0.494           | 0.826 | 0.113        |  |
| L ICA                                 | 4.3 ± 1.9             | 4.3 ± 1.8  | 4.3 ± 2.3                 | 4.4 ± 2.2  | 0.212           | 0.614 | 0.296        |  |
| R VA                                  | 3.4 ± 2.0             | 3.5 ± 2.2  | 3.4 ± 1.8                 | 3.4 ± 1.8  | 0.386           | 0.924 | 0.433        |  |
| L VA                                  | 3.4 ± 2.0             | 3.5 ± 2.0  | 3.5 ± 2.1                 | 3.5 ± 2.3  | 0.286           | 0.751 | 0.974        |  |
| <i>Blood flow velocity (cm/sec)</i>   |                       |            |                           |            |                 |       |              |  |
| R ICA                                 | 25.7 ± 6.4            | 24.5 ± 6.7 | 25.2 ± 7.3                | 25.7 ± 5.7 | 0.676           | 0.808 | 0.346        |  |
| L ICA                                 | 24.4 ± 5.5            | 22.8 ± 4.7 | 24.4 ± 8.2                | 24.5 ± 6.9 | 0.446           | 0.576 | 0.378        |  |
| R VA                                  | 14.3 ± 3.4            | 13.7 ± 2.7 | 13.2 ± 3.4                | 13.5 ± 3.2 | 0.787           | 0.364 | 0.314        |  |
| L VA                                  | 14.5 ± 3.4            | 15.7 ± 4.3 | 14.2 ± 3.7                | 14.1 ± 4.4 | 0.219           | 0.309 | 0.205        |  |

Data are mean ± standard deviation. ICA, internal carotid artery; L, left; R, right; VA, vertebral artery.

**Table S2.** Pearson's product-moment correlation coefficients and (p-value) illustrate the associations between the one-year changes ( $\Delta$ ) in carotid and cerebral hemodynamic variables

|                                  | <i>Carotid hemodynamics</i> |                |                         |                |               | <i>Cerebral hemodynamics</i> |                |                |                |               |
|----------------------------------|-----------------------------|----------------|-------------------------|----------------|---------------|------------------------------|----------------|----------------|----------------|---------------|
|                                  | $\Delta$ cSBP               | $\Delta$ cPP   | $\Delta\beta$ stiffness | $\Delta$ cfPWV | $\Delta$ CIMT | $\Delta$ nCBF                | $\Delta$ nCVR  | $\Delta$ mCBFV | $\Delta$ CVRi  | $\Delta$ PI   |
| <i>Stretching-and-toning</i>     |                             |                |                         |                |               |                              |                |                |                |               |
| $\Delta$ cSBP                    |                             | <b>0.869</b>   | 0.181                   | -0.034         | 0.052         | -0.342                       | <b>0.785</b>   | 0.129          | 0.372          | 0.037         |
| $\Delta$ cPP                     | <b>(0.001)</b>              |                | <b>0.469</b>            | -0.171         | -0.077        | -0.365                       | <b>0.466</b>   | -0.004         | 0.161          | 0.322         |
| $\Delta\beta$ -stiffness         | (0.367)                     | <b>(0.016)</b> |                         | -0.319         | -0.021        | 0.327                        | -0.247         | -0.291         | 0.085          | <b>0.428</b>  |
| $\Delta$ cfPWV                   | (0.868)                     | (0.403)        | (0.104)                 |                | 0.169         | -0.078                       | 0.141          | 0.058          | -0.085         | -0.240        |
| $\Delta$ CIMT                    | (0.797)                     | (0.709)        | (0.918)                 | (0.399)        |               | -0.110                       | 0.164          | -0.094         | 0.161          | 0.115         |
| $\Delta$ nCBF                    | (0.094)                     | (0.079)        | (0.111)                 | (0.709)        | (0.601)       |                              | <b>-0.546</b>  | -0.221         | 0.143          | 0.047         |
| $\Delta$ nCVR                    | <b>(0.001)</b>              | <b>(0.022)</b> | (0.233)                 | (0.501)        | (0.434)       | <b>(0.005)</b>               |                | 0.161          | 0.358          | -0.301        |
| $\Delta$ mCBFV                   | (0.587)                     | (0.986)        | (0.213)                 | (0.809)        | (0.695)       | (0.363)                      | (0.509)        |                | <b>-0.715</b>  | -0.095        |
| $\Delta$ CVRi                    | (0.107)                     | (0.496)        | (0.722)                 | (0.721)        | (0.497)       | (0.560)                      | (0.133)        | <b>(0.001)</b> |                | -0.102        |
| $\Delta$ PI                      | (0.871)                     | (0.144)        | <b>(0.047)</b>          | (0.282)        | (0.609)       | (0.841)                      | (0.184)        | (0.690)        | (0.669)        |               |
| <i>Aerobic Exercise Training</i> |                             |                |                         |                |               |                              |                |                |                |               |
| $\Delta$ cSBP                    |                             | <b>0.878</b>   | 0.275                   | 0.095          | 0.187         | -0.051                       | <b>0.742</b>   | -0.269         | <b>0.753</b>   | 0.090         |
| $\Delta$ cPP                     | <b>(0.001)</b>              |                | 0.196                   | -0.021         | 0.254         | 0.011                        | <b>0.494</b>   | 0.060          | 0.257          | -0.194        |
| $\Delta\beta$ -stiffness         | (0.157)                     | (0.328)        |                         | 0.045          | 0.063         | <b>-0.506</b>                | <b>0.510</b>   | -0.284         | 0.230          | <b>0.622</b>  |
| $\Delta$ cfPWV                   | (0.629)                     | (0.919)        | (0.822)                 |                | -0.240        | 0.329                        | -0.161         | -0.013         | 0.097          | 0.041         |
| $\Delta$ CIMT                    | (0.342)                     | (0.202)        | (0.750)                 | (0.219)        |               | -0.120                       | 0.161          | -0.138         | 0.352          | 0.195         |
| $\Delta$ nCBF                    | (0.799)                     | (0.957)        | <b>(0.007)</b>          | (0.094)        | (0.550)       |                              | <b>-0.629</b>  | <b>0.630</b>   | -0.347         | <b>-0.484</b> |
| $\Delta$ nCVR                    | <b>(0.001)</b>              | <b>(0.010)</b> | <b>(0.007)</b>          | (0.421)        | (0.422)       | <b>(0.001)</b>               |                | <b>-0.681</b>  | <b>0.814</b>   | <b>0.484</b>  |
| $\Delta$ mCBFV                   | (0.251)                     | (0.803)        | (0.225)                 | (0.956)        | (0.561)       | <b>(0.004)</b>               | <b>(0.001)</b> |                | <b>-0.746</b>  | <b>-0.559</b> |
| $\Delta$ CVRi                    | <b>(0.001)</b>              | (0.274)        | (0.329)                 | (0.683)        | (0.128)       | (0.145)                      | <b>(0.001)</b> | <b>(0.001)</b> |                | <b>0.486</b>  |
| $\Delta$ PI                      | (0.707)                     | (0.412)        | <b>(0.003)</b>          | (0.864)        | (0.409)       | <b>(0.036)</b>               | <b>(0.036)</b> | <b>(0.010)</b> | <b>(0.030)</b> |               |

cSBP, carotid systolic blood pressure; cPP, carotid pulse pressure;  $\beta$ -stiffness, carotid  $\beta$ -stiffness index; cfPWV, carotid-femoral pulse wave velocity; CIMT, carotid intima-media thickness; nCBF, normalized cerebral blood flow; nCVR, normalized cerebrovascular resistance; mCBFV, mean cerebral blood flow velocity; CVRi, cerebrovascular index; PI, pulsatility index. Bold values represent  $p < 0.05$ . Data of mCBFV, CVRi, and PI were measured at the middle cerebral artery and are available 22 in SAT and 21 in AET.

**Table S3.** Correlation between one-year changes ( $\Delta$ ) in neurocognitive performance and hemodynamic variables

|                                   | $\Delta$ cSBP     | $\Delta$ cPP      | $\Delta\beta$ stiffness | $\Delta$ cfPWV                  | $\Delta$ CIMT     | $\Delta$ nCBF                   | $\Delta$ nCVR     | $\Delta$ mCBFV    | $\Delta$ CVRi                   | $\Delta$ PI                     |
|-----------------------------------|-------------------|-------------------|-------------------------|---------------------------------|-------------------|---------------------------------|-------------------|-------------------|---------------------------------|---------------------------------|
| <i>Stretching-and-toning</i>      |                   |                   |                         |                                 |                   |                                 |                   |                   |                                 |                                 |
| $\Delta$ ETS Letter Sets          | -0.204<br>(0.339) | -0.191<br>(0.382) | -0.153<br>(0.474)       | 0.005<br>(0.982)                | -0.106<br>(0.621) | 0.265<br>(0.211)                | -0.186<br>(0.385) | -0.128<br>(0.601) | 0.034<br>(0.891)                | -0.105<br>(0.660)               |
| $\Delta$ RPM accuracies           | -0.120<br>(0.576) | 0.071<br>(0.746)  | 0.109<br>(0.611)        | -0.087<br>(0.685)               | 0.053<br>(0.806)  | <b>0.436</b><br><b>(0.033)</b>  | -0.344<br>(0.100) | -0.218<br>(0.371) | 0.077<br>(0.754)                | 0.086<br>(0.718)                |
| $\Delta$ LM Immediate recalls     | -0.171<br>(0.425) | -0.219<br>(0.316) | 0.110<br>(0.61)         | <b>-0.445</b><br><b>(0.029)</b> | -0.164<br>(0.444) | 0.345<br>(0.099)                | -0.128<br>(0.552) | 0.049<br>(0.843)  | -0.033<br>(0.894)               | 0.276<br>(0.238)                |
| $\Delta$ LM Delayed recalls       | -0.355<br>(0.088) | -0.253<br>(0.245) | -0.001<br>(0.997)       | -0.176<br>(0.410)               | -0.110<br>(0.610) | -0.017<br>(0.937)               | -0.246<br>(0.246) | 0.122<br>(0.618)  | -0.222<br>(0.360)               | 0.222<br>(0.346)                |
| $\Delta$ WJ Immediate recalls     | -0.074<br>(0.729) | 0.011<br>(0.959)  | -0.009<br>(0.966)       | 0.197<br>(0.355)                | -0.155<br>(0.468) | 0.106<br>(0.622)                | -0.228<br>(0.283) | 0.370<br>(0.118)  | -0.251<br>(0.301)               | 0.002<br>(0.994)                |
| $\Delta$ WJ Delayed recalls       | -0.280<br>(0.185) | -0.334<br>(0.119) | -0.027<br>(0.901)       | 0.224<br>(0.292)                | -0.076<br>(0.724) | 0.129<br>(0.548)                | -0.202<br>(0.343) | 0.278<br>(0.249)  | -0.121<br>(0.623)               | 0.128<br>(0.591)                |
| $\Delta$ Digit Comparison         | -0.203<br>(0.342) | -0.075<br>(0.732) | -0.119<br>(0.579)       | 0.054<br>(0.803)                | -0.095<br>(0.660) | -0.264<br>(0.213)               | -0.184<br>(0.390) | 0.019<br>(0.938)  | -0.250<br>(0.302)               | 0.162<br>(0.496)                |
| $\Delta$ Letter Number Sequencing | -0.291<br>(0.168) | -0.183<br>(0.402) | -0.188<br>(0.379)       | -0.082<br>(0.702)               | -0.193<br>(0.367) | -0.233<br>(0.274)               | -0.214<br>(0.316) | 0.408<br>(0.083)  | <b>-0.595</b><br><b>(0.007)</b> | 0.350<br>(0.13)                 |
| $\Delta$ Operation Span           | 0.063<br>(0.769)  | 0.066<br>(0.763)  | 0.043<br>(0.843)        | 0.249<br>(0.240)                | 0.111<br>(0.607)  | 0.12<br>(0.576)                 | 0.057<br>(0.79)   | -0.018<br>(0.941) | 0.071<br>(0.771)                | <b>-0.455</b><br><b>(0.044)</b> |
| $\Delta$ COWAT-FAS                | 0.017<br>(0.937)  | -0.121<br>(0.581) | -0.132<br>(0.540)       | -0.229<br>(0.281)               | -0.026<br>(0.902) | 0.100<br>(0.643)                | 0.093<br>(0.664)  | 0.312<br>(0.194)  | -0.045<br>(0.856)               | -0.138<br>(0.561)               |
| $\Delta$ ETS Vocabulary           | 0.230<br>(0.279)  | 0.156<br>(0.476)  | -0.351<br>(0.093)       | <b>0.514</b><br><b>(0.010)</b>  | 0.034<br>(0.873)  | <b>-0.447</b><br><b>(0.028)</b> | 0.256<br>(0.228)  | 0.205<br>(0.400)  | -0.152<br>(0.534)               | -0.016<br>(0.945)               |

cSBP, carotid systolic blood pressure; cPP, carotid pulse pressure;  $\beta$ -stiffness, carotid  $\beta$ -stiffness index; cfPWV, carotid-femoral pulse wave velocity; CIMT, carotid intima-media thickness; nCBF and nCVR, normalized cerebral blood flow and cerebrovascular resistance by total brain tissue mass measured by magnetic resonance imaging; mCBFV, mean cerebral blood flow velocity; CVRi, cerebrovascular index; PI, pulsatility index; ETS, educational testing service; RPM, Raven's Progressive Matrices; LM, logical memory; WJ, Woodcock-Johnson, COWAT-FAS, COWAT-FAS, Controlled Word Association FAS. Data of mCBFV, CVRi, and PI were measured at the middle cerebral artery and are available 22 in SAT. Bold values represent  $p < 0.05$ .

**Table S3 (Cont.).** Correlation between one-year changes ( $\Delta$ ) in neurocognitive performance and hemodynamic variables

|                                   | $\Delta$ cSBP                   | $\Delta$ cPP      | $\Delta\beta$ stiffness         | $\Delta$ cfPWV                  | $\Delta$ CIMT                  | $\Delta$ nCBF     | $\Delta$ nCVR                   | $\Delta$ mCBFV    | $\Delta$ CVRi                   | $\Delta$ PI       |
|-----------------------------------|---------------------------------|-------------------|---------------------------------|---------------------------------|--------------------------------|-------------------|---------------------------------|-------------------|---------------------------------|-------------------|
| <i>Aerobic Exercise Training</i>  |                                 |                   |                                 |                                 |                                |                   |                                 |                   |                                 |                   |
| $\Delta$ ETS Letter Sets          | -0.157<br>(0.436)               | -0.249<br>(0.220) | 0.128<br>(0.524)                | 0.262<br>(0.187)                | 0.345<br>(0.078)               | 0.186<br>(0.364)  | -0.236<br>(0.245)               | -0.041<br>(0.866) | 0.127<br>(0.604)                | 0.275<br>(0.255)  |
| $\Delta$ RPM accuracies           | 0.039<br>(0.847)                | 0.361<br>(0.070)  | -0.218<br>(0.275)               | -0.337<br>(0.085)               | 0.027<br>(0.894)               | -0.032<br>(0.876) | -0.099<br>(0.632)               | 0.348<br>(0.144)  | <b>-0.594</b><br><b>(0.007)</b> | -0.396<br>(0.093) |
| $\Delta$ LM Immediate recalls     | <b>-0.473</b><br><b>(0.013)</b> | -0.325<br>(0.106) | -0.178<br>(0.374)               | -0.053<br>(0.791)               | -0.152<br>(0.45)               | 0.048<br>(0.818)  | <b>-0.423</b><br><b>(0.031)</b> | 0.205<br>(0.400)  | <b>-0.516</b><br><b>(0.024)</b> | -0.163<br>(0.505) |
| $\Delta$ LM Delayed recalls       | -0.265<br>(0.182)               | -0.301<br>(0.136) | -0.171<br>(0.393)               | -0.055<br>(0.786)               | -0.137<br>(0.496)              | -0.034<br>(0.870) | -0.020<br>(0.924)               | 0.158<br>(0.519)  | -0.179<br>(0.464)               | -0.207<br>(0.395) |
| $\Delta$ WJ Immediate recalls     | <b>-0.394</b><br><b>(0.042)</b> | -0.300<br>(0.136) | <b>-0.498</b><br><b>(0.008)</b> | -0.097<br>(0.629)               | -0.062<br>(0.761)              | 0.290<br>(0.151)  | <b>-0.483</b><br><b>(0.012)</b> | 0.147<br>(0.547)  | -0.329<br>(0.169)               | -0.449<br>(0.054) |
| $\Delta$ WJ Delayed recalls       | -0.182<br>(0.364)               | -0.221<br>(0.278) | -0.058<br>(0.775)               | 0.014<br>(0.945)                | -0.290<br>(0.143)              | 0.189<br>(0.354)  | -0.206<br>(0.312)               | -0.034<br>(0.891) | -0.115<br>(0.640)               | -0.047<br>(0.849) |
| $\Delta$ Digit Comparison         | 0.172<br>(0.390)                | 0.169<br>(0.410)  | 0.227<br>(0.255)                | 0.215<br>(0.281)                | 0.052<br>(0.795)               | -0.069<br>(0.737) | 0.205<br>(0.316)                | -0.451<br>(0.053) | 0.298<br>(0.216)                | 0.238<br>(0.326)  |
| $\Delta$ Letter Number Sequencing | 0.050<br>(0.805)                | 0.102<br>(0.619)  | -0.036<br>(0.859)               | 0.060<br>(0.765)                | 0.216<br>(0.278)               | -0.118<br>(0.564) | 0.109<br>(0.596)                | 0.042<br>(0.864)  | -0.041<br>(0.869)               | -0.082<br>(0.739) |
| $\Delta$ Operation Span           | -0.033<br>(0.868)               | 0.149<br>(0.467)  | -0.070<br>(0.730)               | <b>-0.473</b><br><b>(0.013)</b> | <b>0.417</b><br><b>(0.030)</b> | 0.057<br>(0.782)  | -0.082<br>(0.690)               | 0.307<br>(0.202)  | -0.193<br>(0.428)               | -0.066<br>(0.789) |
| $\Delta$ COWAT-FAS                | 0.163<br>(0.416)                | 0.119<br>(0.562)  | 0.210<br>(0.292)                | 0.104<br>(0.604)                | 0.115<br>(0.568)               | 0.212<br>(0.300)  | -0.122<br>(0.552)               | 0.062<br>(0.802)  | 0.323<br>(0.177)                | 0.268<br>(0.267)  |
| $\Delta$ ETS Vocabulary           | 0.103<br>(0.609)                | 0.218<br>(0.284)  | -0.101<br>(0.615)               | 0.010<br>(0.959)                | 0.194<br>(0.333)               | 0.119<br>(0.562)  | -0.121<br>(0.556)               | 0.319<br>(0.183)  | -0.207<br>(0.395)               | -0.008<br>(0.973) |

cSBP, carotid systolic blood pressure; cPP, carotid pulse pressure;  $\beta$ -stiffness, carotid  $\beta$ -stiffness index; cfPWV, carotid-femoral pulse wave velocity; CIMT, carotid intima-media thickness; nCBF and nCVR, normalized cerebral blood flow and cerebrovascular resistance by total brain tissue mass measured by magnetic resonance imaging; mCBFV, mean cerebral blood flow velocity; CVRi, cerebrovascular index; PI, pulsatility index; ETS, educational testing service; RPM, Raven's Progressive Matrices; LM, logical memory; WJ, Woodcock-Johnson, COWAT-FAS, COWAT-FAS, Controlled Word Association FAS. Data of mCBFV, CVRi, and PI were measured at the middle cerebral artery and are available 21 in AET. Bold values represent  $p < 0.05$ .

**Table S4:** Test-retest reliability estimates compared between the baseline and 12-month follow-up measurements

|                                                |           | <i>n</i> | ICC   | (95% CI) |          | p-value        |
|------------------------------------------------|-----------|----------|-------|----------|----------|----------------|
| Peak oxygen consumption                        | mL/min    | 54       | 0.952 | 0.917    | to 0.972 | < <b>0.001</b> |
|                                                | mL/kg/min | 54       | 0.899 | 0.826    | to 0.942 | < <b>0.001</b> |
| <i><u>Carotid hemodynamics parameters</u></i>  |           |          |       |          |          |                |
| Systolic blood pressure                        |           | 55       | 0.617 | 0.343    | to 0.777 | < <b>0.001</b> |
| Pulse pressure                                 |           | 55       | 0.681 | 0.453    | to 0.814 | < <b>0.001</b> |
| $\beta$ -stiffness index                       |           | 55       | 0.825 | 0.701    | to 0.898 | < <b>0.001</b> |
| carotid-femoral pulse wave velocity            |           | 55       | 0.790 | 0.640    | to 0.877 | < <b>0.001</b> |
| Intima-media thickness                         |           | 55       | 0.836 | 0.719    | to 0.905 | < <b>0.001</b> |
| <i><u>Cerebral hemodynamics parameters</u></i> |           |          |       |          |          |                |
| Total CBF                                      |           | 55       | 0.898 | 0.825    | to 0.940 | < <b>0.001</b> |
| Internal carotid artery blood flow             |           | 55       | 0.880 | 0.794    | to 0.930 | < <b>0.001</b> |
| Vertebral artery blood flow                    |           | 55       | 0.904 | 0.835    | to 0.944 | < <b>0.001</b> |
| Normalized CBF                                 |           | 55       | 0.884 | 0.797    | to 0.933 | < <b>0.001</b> |
| CVR                                            |           | 55       | 0.780 | 0.622    | to 0.871 | < <b>0.001</b> |
| Normalized CVR                                 |           | 55       | 0.843 | 0.726    | to 0.910 | < <b>0.001</b> |
| CBF velocity                                   |           | 43       | 0.955 | 0.914    | to 0.976 | < <b>0.001</b> |
| CVR index                                      |           | 43       | 0.925 | 0.859    | to 0.961 | < <b>0.001</b> |
| Pulsatility index                              |           | 43       | 0.902 | 0.819    | to 0.947 | < <b>0.001</b> |

Intraclass correlations (ICC) and 95% confidence interval (CI) were calculated by the two-way mixed, average measures. *n* is the number of observations included in the analysis. CBF, cerebral blood flow; CVR, cerebrovascular resistance.

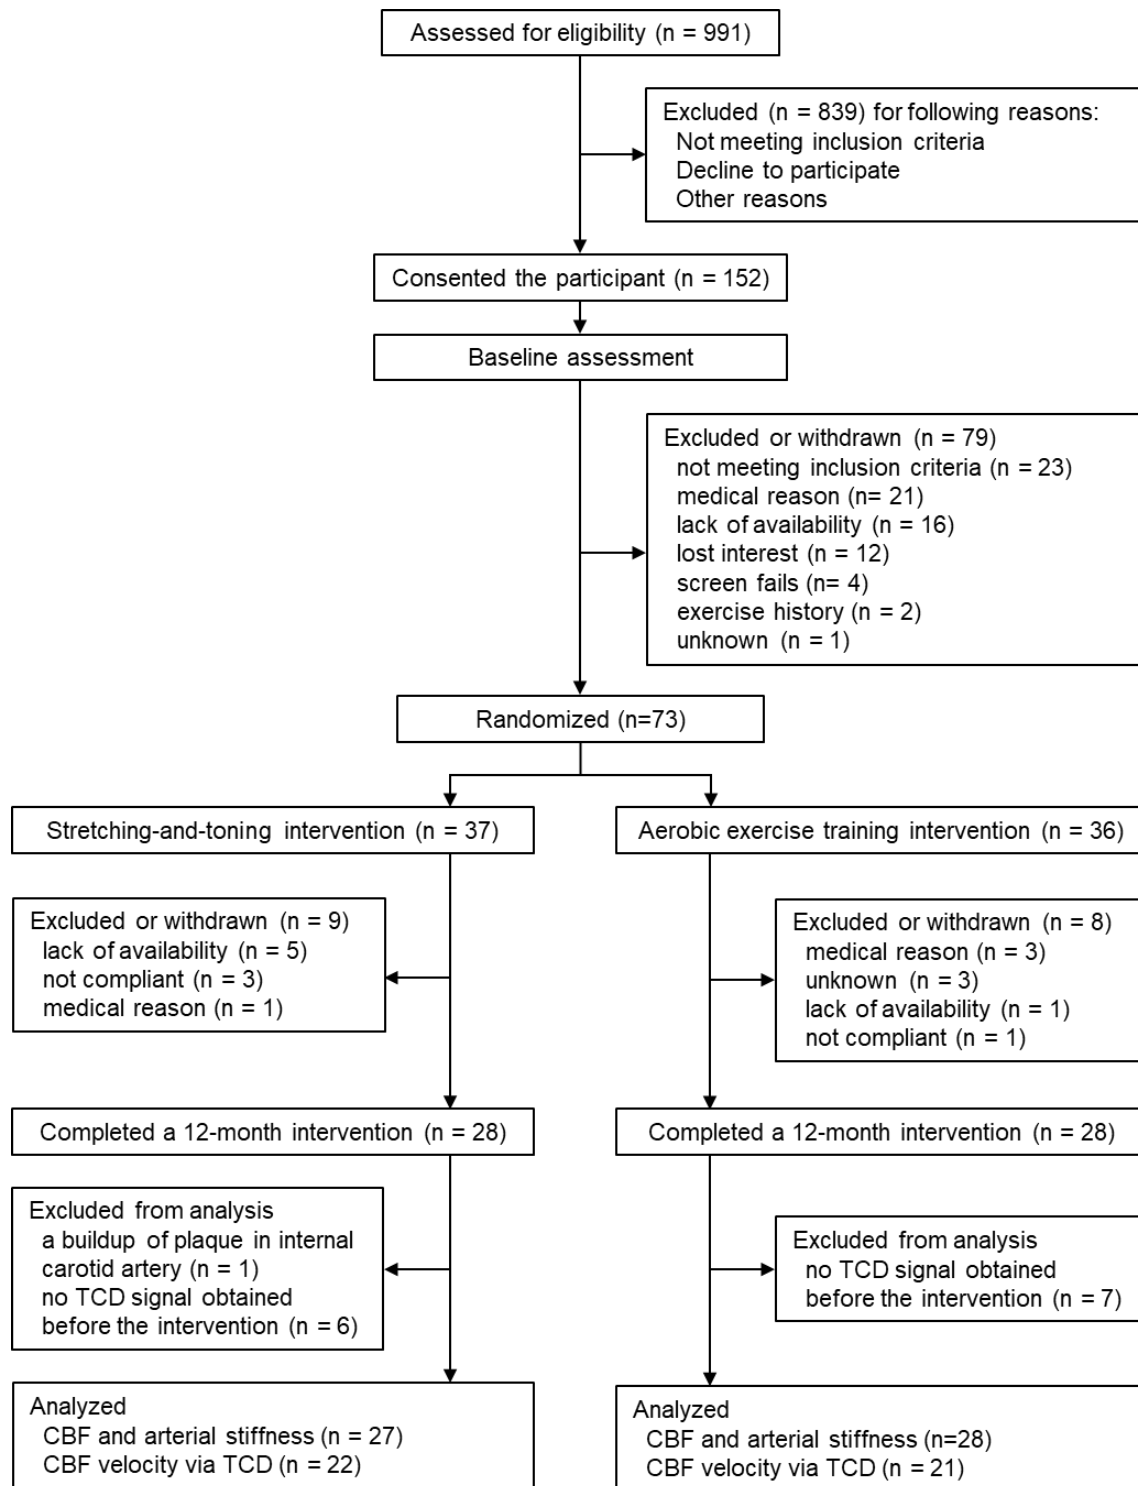

**Figure S1:** Participant flowchart. Participants were randomized into 12-months of aerobic exercise training or stretching-and-toning programs. Statistical analysis was performed in 55 participants (27 in stretching-and-toning and 28 in aerobic exercise training) who completed the training and had cerebral blood flow (CBF) and arterial stiffness measurements. Among the 55 participants, 43 (22 in stretching-and-toning and 21 in aerobic exercise training) had CBF velocity measurements via transcranial Doppler (TCD).

# Baseline

## Internal carotid artery

CIMT  
L12-3  
21Hz  
3cm

2D  
HGen  
Gn 46  
C 50  
2/3/2  
50 mm/s

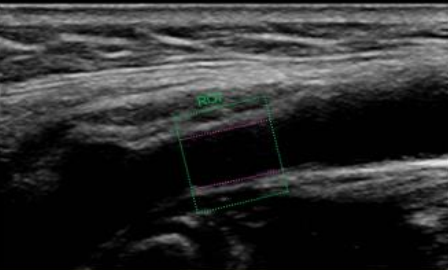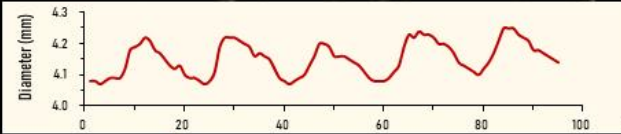

CIMT  
L12-3  
30Hz  
3cm

2D  
HGen  
Gn 46  
C 50  
2/3/2

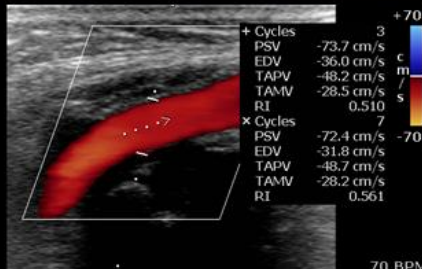

Color  
5.0 MHz  
Gn 60  
3/7/6  
Filtr Low

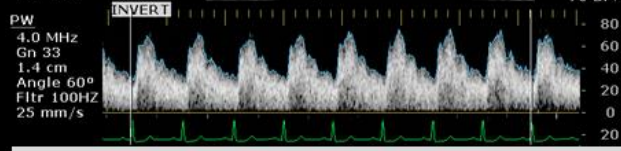

# 12-month

## Internal carotid artery

CIMT  
L12-3  
22Hz  
2cm

2D  
HGen  
Gn 40  
C 50  
2/3/2  
50 mm/s

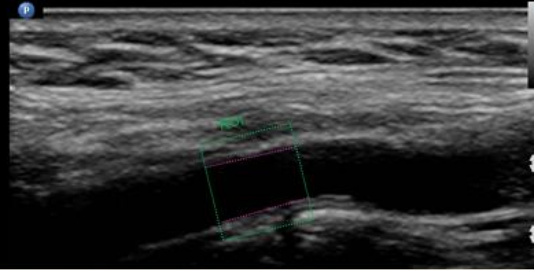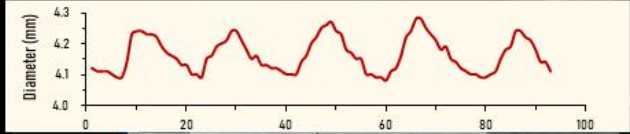

CIMT  
L12-3  
22Hz  
2cm

2D  
HGen  
Gn 40  
C 50  
2/3/2

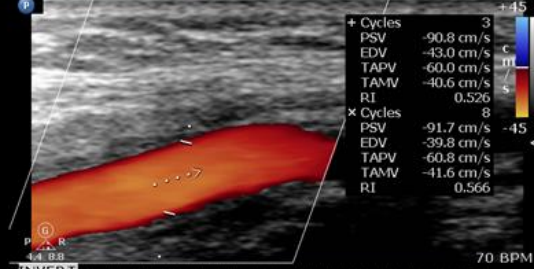

Color  
5.0 MHz  
Gn 60  
3/7/6  
Filtr Low

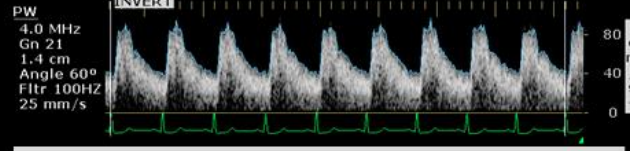

## Vertebral artery

CIMT  
L12-3  
20Hz  
4cm

2D  
HGen  
Gn 56  
C 50  
2/3/2  
50 mm/s

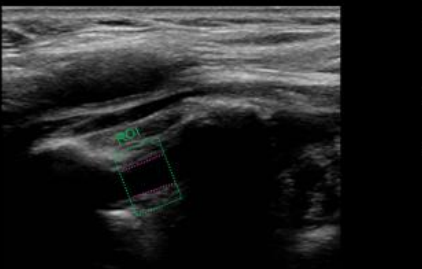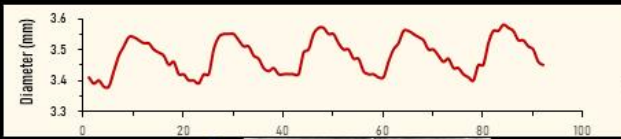

CIMT  
L12-3  
4cm

2D  
HGen  
Gn 56  
C 50  
2/3/2

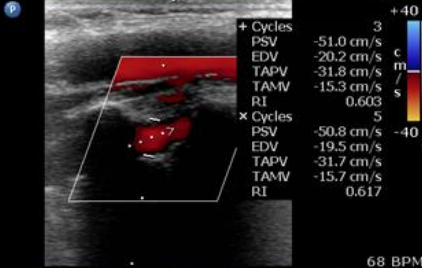

Color  
5.0 MHz  
Gn 63  
3/7/6  
Filtr Low

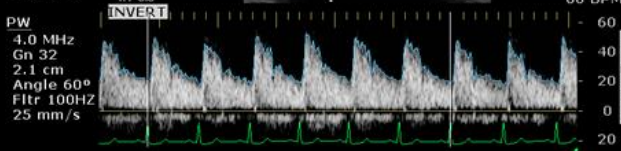

## Vertebral artery

CIMT  
L12-3  
21Hz  
3cm

2D  
HGen  
Gn 66  
C 50  
2/3/2  
50 mm/s

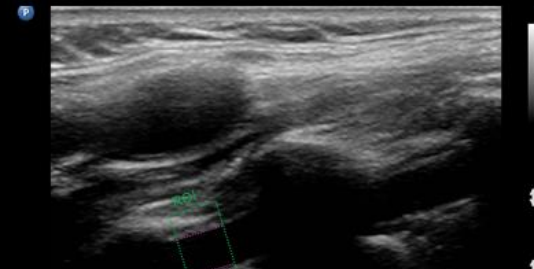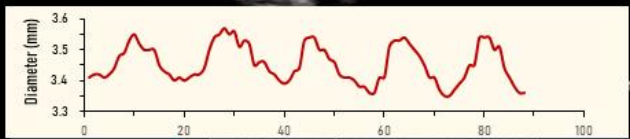

CIMT  
L12-3  
22Hz  
3cm

2D  
HGen  
Gn 66  
C 50  
2/3/2

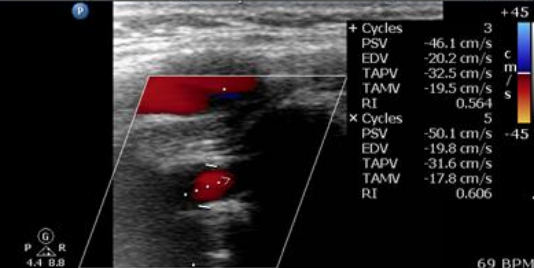

Color  
5.0 MHz  
Gn 60  
3/7/6  
Filtr Low

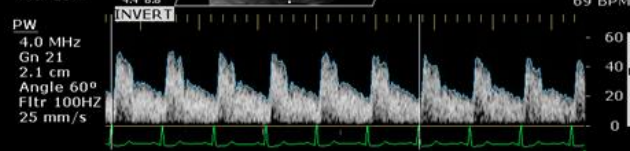



**Figure S2:** Representation of ultrasonography image of measurement of blood flow in the right internal carotid artery (ICA: upper panel) and the right vertebral artery (VA: lower panel) with color-coded duplex ultrasonogram at baseline (left side) and 12-month (right side) from one subject in the aerobic exercise training group. High-resolution B-mode image of the ICA and VA. Regions of interest, represented by the green rectangles are manually selected to cover a segment of the ICA or VA, the double pink lines are the detected vessel inner walls used to track the wall movements and to measure beat-by-beat pulsatile changes of vessel diameter for the ICA and VA. Beat-by-beat recordings of blood flow velocity at the sites of diameter measurements are presented for the ICA and VA.

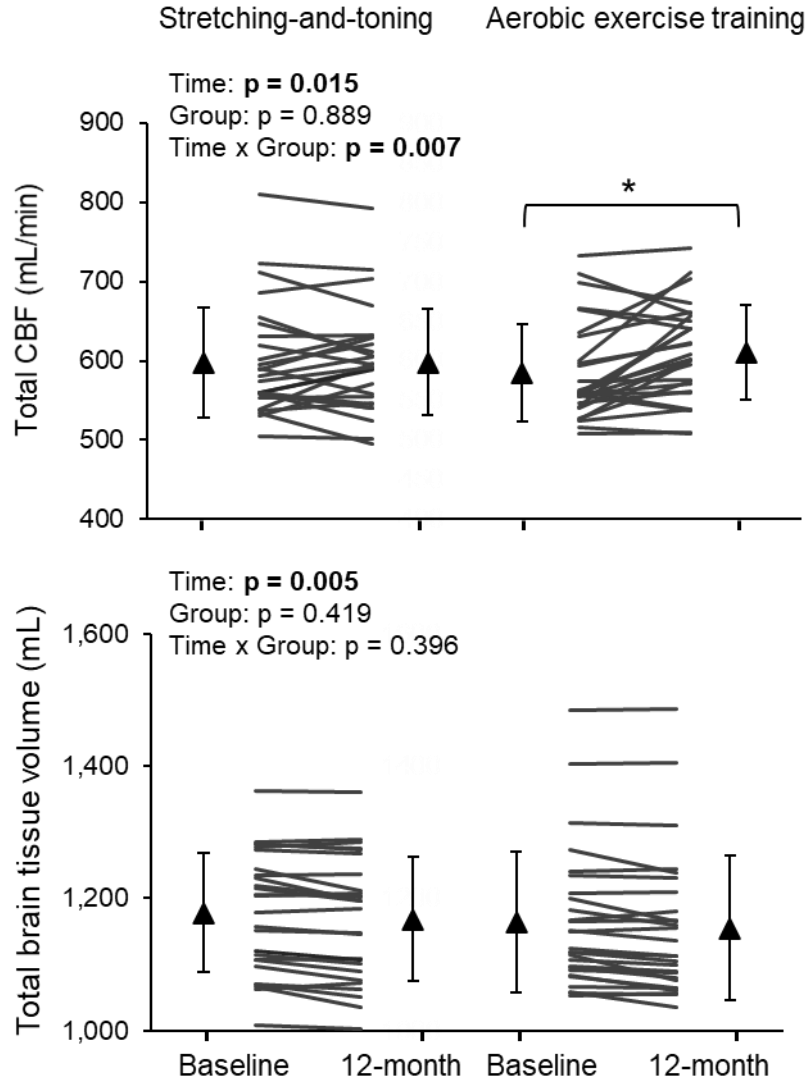

**Figure S3:** Changes in total cerebral blood flow (CBF) (upper panel) and total brain tissue volume (lower panel) after one-year stretching-and-toning or aerobic exercise training. Thin lines represent individual changes. Triangles show mean values and the error bars represent standard deviations. \*  $p < 0.05$  compared with baseline after Bonferroni correction.

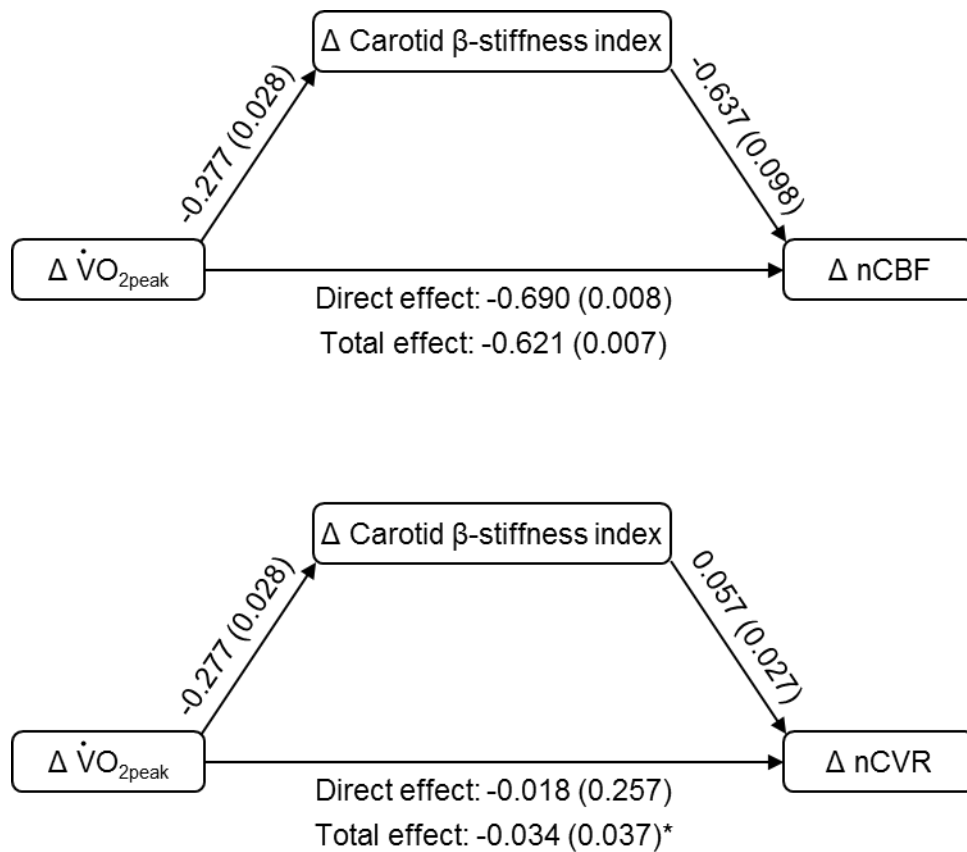

**Figure S4:** Mediation model to assess the relationship between changes in peak oxygen consumption ( $\dot{V}O_{2\text{peak}}$ ) and normalized cerebral blood flow (nCBF: upper panel) or cerebrovascular resistance (nCVR: lower panel) with carotid  $\beta$ -arterial stiffness as a mediator in the aerobic exercise training group. Data are unstandardized regression coefficient (p-value). Changes in carotid  $\beta$ -arterial stiffness attenuated the negative association between  $\dot{V}O_{2\text{peak}}$  and nCVR. \* This result was further confirmed by a bootstrapping assessment, which demonstrated significant indirect effects of carotid  $\beta$ -arterial stiffness on nCVR (95% confidence interval: -0.005 to -0.037). A data set of  $n = 28$  was used for modeling.
